# Supplementary material for: Novel [FeFe]-Hydrogenase Mimics: Unexpected Course of the Reaction of Ferrocenyl α-Thienyl Thioketone with Fe3(CO)12
Source: MDPI journal article supplement (doi:10.3390/ma15082867), 2022-04-14
Supplement: s1 [file s1]

## Article

# Novel [FeFe]-Hydrogenase Mimics: Unexpected Course of the Reaction of Ferrocenyl $\alpha$ -Thienyl Thioketone with $\text{Fe}_3(\text{CO})_{12}$

Ahmad Q. Daraosheh <sup>1</sup>, Hassan Abul-Futouh <sup>2,\*</sup>, Natsuki Murakami <sup>3</sup>, Karl Michael Ziems <sup>4</sup>, Helmar Görls <sup>5</sup>, Stephan Kupfer <sup>4</sup>, Stefanie Gräfe <sup>4</sup>, Akihiko Ishii <sup>3</sup>, Małgorzata Celeda <sup>6</sup>, Grzegorz Młoston <sup>6,\*</sup> and Wolfgang Weigand <sup>5,\*</sup>

<sup>1</sup> Department of Chemistry, College of Arts and Sciences, University of Petra, P.O. Box 961343, Amman 11196, Jordan; adaraosheh@uop.edu.jo

<sup>2</sup> Department of Chemistry, Faculty of Science, The Hashemite University, P.O. Box 330127, Zarqa 13133, Jordan

<sup>3</sup> Department of Chemistry, Graduate School of Science and Engineering, Saitama University, Shimo-okubo, Sakura-ku, Saitama 338-8570, Japan; n.murakami.808@outlook.jp (N.M.); ishiiaki@chem.saitama-u.ac.jp (A.I.)

<sup>4</sup> Institut für Physikalische Chemie und Abbe Center of Photonics, Friedrich-Schiller-Universität Jena, Helmholtzweg 4, 07743 Jena, Germany; karl-michael.ziems@uni-jena.de (K.M.Z.); stephan.kupfer@uni-jena.de (S.K.); s.graefe@uni-jena.de (S.G.)

<sup>5</sup> Institut für Anorganische und Analytische Chemie, Friedrich-Schiller-Universität Jena, Humboldt Str. 8, 07743 Jena, Germany; helmar.goerls@uni-jena.de

<sup>6</sup> Department of Organic & Applied Chemistry, University of Lodz, Tamka 12, 91-403 Łódź, Poland; malgorzata.celeda@chemia.uni.lodz.pl

\* Correspondence: habulfutouh@gmail.com (H.A.-F.); grzegorz.mloston@chemia.uni.lodz.pl (G.M.); wolfgang.weigand@uni-jena.de (W.W.)

**Citation:** Daraosheh, A.Q.;

Abul-Futouh, H.; Murakami, N.; Ziems, K.M.; Görls, H.; Kupfer, S.; Gräfe, S.; Ishii, A.; Celeda, M.; Młoston, G.; et al. A Novel Type of the [FeFe]-Hydrogenase Mimics: Unexpected Course of the Reaction of Ferrocenyl  $\alpha$ -Thienyl Thioketone with  $\text{Fe}_3(\text{CO})_{12}$ . *Materials* **2022**, *15*, 2862. <https://doi.org/10.3390/ma15082862>

Academic Editor: Maria Rosaria Plutino

Received: 24 February 2022

Accepted: 11 April 2022

Published: 13 April 2022

**Publisher's Note:** MDPI stays neutral with regard to jurisdictional claims in published maps and institutional affiliations.

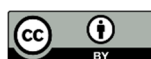

**Copyright:** © 2022 by the authors. Submitted for possible open access publication under the terms and conditions of the Creative Commons Attribution (CC BY) license (<https://creativecommons.org/licenses/by/4.0/>).

**Abstract:** The influence of the substitution pattern in ferrocenyl  $\alpha$ -thienyl thioketone used as a proligand in complexation reactions with  $\text{Fe}_3(\text{CO})_{12}$  was investigated. As a result, two new sulfur–iron complexes, considered [FeFe]-hydrogenase mimics, were obtained and characterized by spectroscopic techniques ( $^1\text{H}$ ,  $^{13}\text{C}\{^1\text{H}\}$  NMR, IR, MS), as well as by elemental analysis and X-ray single crystal diffraction methods. The electrochemical properties of both complexes were studied and compared using cyclic voltammetry in the absence and in presence of acetic acid as a proton source. The performed measurements demonstrated that both complexes can catalyze the reduction of protons to elemental hydrogen  $\text{H}_2$ . Moreover, the obtained results showed that the presence of the ferrocene moiety at the backbone of the linker of both complexes improved the stability of the reduced species.

**Keywords:** sulfur–iron clusters; hydrogenase active centers mimics; heteroaryl thioketones; ferrocenyl thioketones; iron carbonyls; dearomatization; reaction mechanisms; cyclic voltammetry; X-ray diffraction analysis

## 1. Electrochemistry

Corrections for the  $iR$  drop were performed for all experiments. Cyclic voltammetry measurements were conducted by applying the three-electrode technique - glassy carbon disk (diameter = 1.6 mm) as working electrode;  $\text{Ag}/\text{Ag}^+$  in MeCN as reference electrode; Pt wire as counter electrode. The Reference 600 Potentiostat (Gamry Instruments) was used to realize the measurements. All experiments were performed at rt in  $\text{CH}_2\text{Cl}_2$  solutions (concentration 1.0 mM), containing 0.1 M tetrabutylammonium tetrafluoroborate ( $n\text{-Bu}_4\text{N}(\text{BF}_4)$ ). The solutions were initially purged with a gentle  $\text{N}_2$  stream which subsequently was maintained over the solution surface during the measurement. Typically, the vitreous carbon disk was polished on a felt tissue coated with

alumina before the measurement started. All potential values reported in this paper are referenced to the potential of the ferrocenium/ferrocene (Fc<sup>+</sup>/Fc) couple.

## 2. Computational Work

Quantum chemical calculations were carried out using the Gaussian 16 program [1], which is based on the DFT method by means of the hybrid functional B3LYP [2,3] and the triple- $\zeta$ -valence-polarization (TZVP) [4] basis set. For the iron atoms, the effective core potential MDF10 [5] was used. Fully relaxed equilibrium structures of complexes 2 and 3 (singlet ground state) were obtained based on results of the X-ray analysis. A vibrational analysis upon geometry optimization confirmed the obtained structures by the presence of minima observed on the 3N-6-dimensional potential energy hypersurface.

## 3. X-Ray Crystal Structure Analysis

The intensity data for the compounds were collected on a Nonius KappaCCD diffractometer using graphite-monochromated Mo-K $\alpha$  radiation. Data were corrected for Lorentz and polarization effects; absorption was considered on a semi-empirical basis using multiple-scans [6–8]. The structures were solved by direct methods (SHELXS) [9] and refined by full-matrix least squares techniques against  $F_o^2$  (SHELXL-2018) [10]. All hydrogen atoms were included at calculated positions with fixed thermal parameters. Disordered thiophene molecule of 3 was refined using bond lengths restraints and displacement parameter restraints. The disorder model was introduced by the program DSR [11]. All non-hydrogen atoms were refined anisotropically [9] MERCURY was used for structure representations [12].

**Crystal Data for 2:** C<sub>21</sub>H<sub>12</sub>Fe<sub>3</sub>O<sub>6</sub>S<sub>2</sub>, Mr = 591.98 g mol<sup>−1</sup>, brown prism, size 0.108 × 0.088 × 0.076 mm<sup>3</sup>, monoclinic, space group C 2/c, a = 20.0130(5), b = 13.0408(3), c = 17.7418(4) Å,  $\beta$  = 111.899(1)°, V = 4296.24(18) Å<sup>3</sup>, T = −140 °C, Z = 8,  $\rho_{\text{calcd.}}$  = 1.830 g cm<sup>−3</sup>,  $\mu$  (Mo-K $\alpha$ ) = 22.3 cm<sup>−1</sup>, multi-scan, transmin: 0.6461, transmax: 0.7456, F(000) = 2368, 14502 reflections in h(−25/25), k(−16/16), l(−23/22), measured in the range 2.194° ≤  $\Theta$  ≤ 27.481°, completeness  $\Theta_{\text{max}}$  = 99.4%, 4882 independent reflections, R<sub>int</sub> = 0.0421, 4279 reflections with  $F_o > 4\sigma(F_o)$ , 289 parameters, 0 restraints, R<sub>1obs</sub> = 0.0328, wR<sub>2obs</sub> = 0.0612, R<sub>1all</sub> = 0.0408, wR<sub>2all</sub> = 0.0649, GOOF = 1.070, largest difference peak and hole: 0.440 / −0.345 e Å<sup>−3</sup>.

**Crystal Data for 3:** C<sub>36</sub>H<sub>24</sub>Fe<sub>4</sub>O<sub>6</sub>S<sub>3</sub>, Mr = 872.13 g mol<sup>−1</sup>, brown prism, size 0.102 × 0.100 × 0.066 mm<sup>3</sup>, monoclinic, space group P 2<sub>1</sub>/c, a = 7.6700(4), b = 38.7090(9), c = 11.4230(4) Å,  $\beta$  = 92.709(1)°, V = 3387.7(2) Å<sup>3</sup>, T = −140 °C, Z = 4,  $\rho_{\text{calcd.}}$  = 1.710 g cm<sup>−3</sup>,  $\mu$  (Mo-K $\alpha$ ) = 19.1 cm<sup>−1</sup>, multi-scan, transmin: 0.5432, transmax: 0.7457, F(000) = 1760, 42623 reflections in h(−9/8), k(−50/50), l(−14/14), measured in the range 1.861° ≤  $\Theta$  ≤ 27.484°, completeness  $\Theta_{\text{max}}$  = 99.8%, 7745 independent reflections, R<sub>int</sub> = 0.0485, 6047 reflections with  $F_o > 4\sigma(F_o)$ , 488 parameters, 76 restraints, R<sub>1obs</sub> = 0.0477, wR<sub>2obs</sub> = 0.1117, R<sub>1all</sub> = 0.0668, wR<sub>2all</sub> = 0.1196, GOOF = 1.029, largest difference peak and hole: 1.594 / −0.748 e Å<sup>−3</sup>.

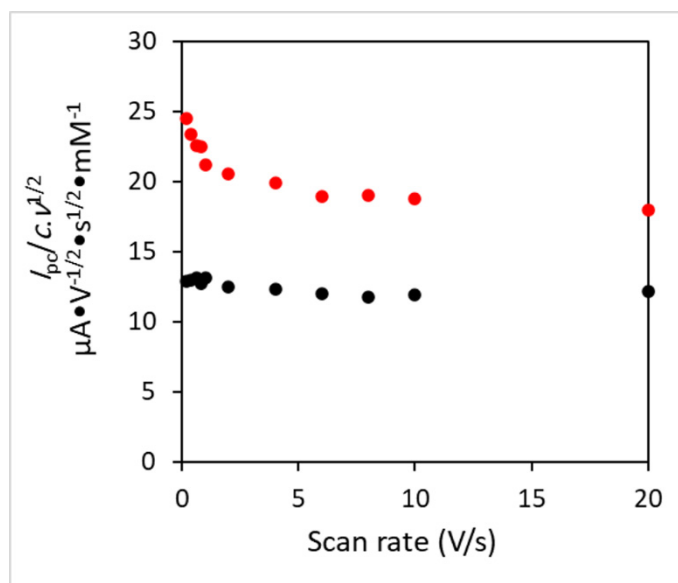

**Figure S1.** Scan rate dependence of the current function of the reduction events of complexes 2 (black) and 3 (red).

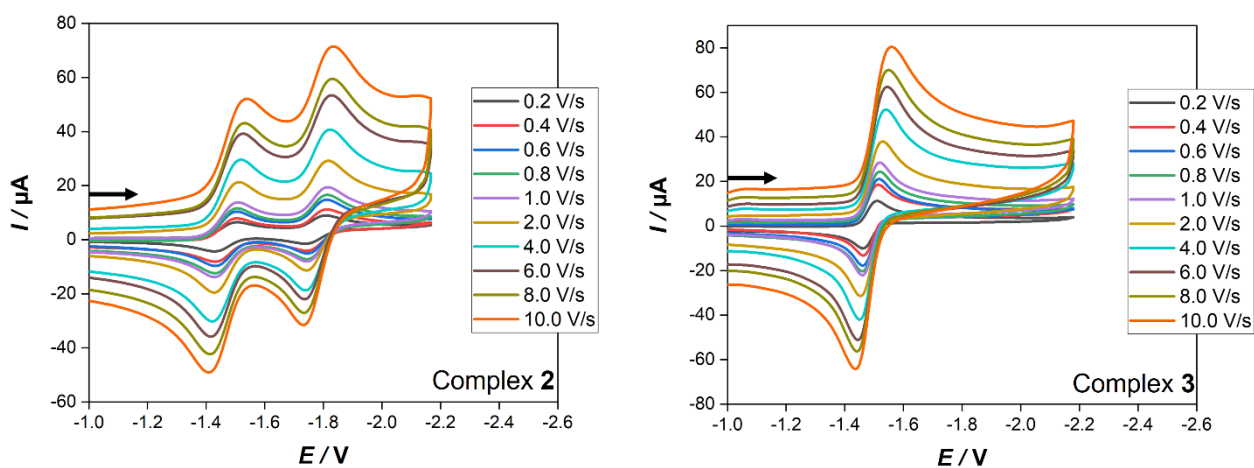

**Figure S2.** Cyclic voltammetry of 1.0 mM of complexes 2 and 3 in  $CH_2Cl_2$ -[*n*-Bu<sub>4</sub>N][BF<sub>4</sub>] (0.1 M) solution at various scan rates. The arrows indicate the scan direction. The potentials  $E$  are given in V and referenced to the Fc<sup>+</sup>/Fc couple.

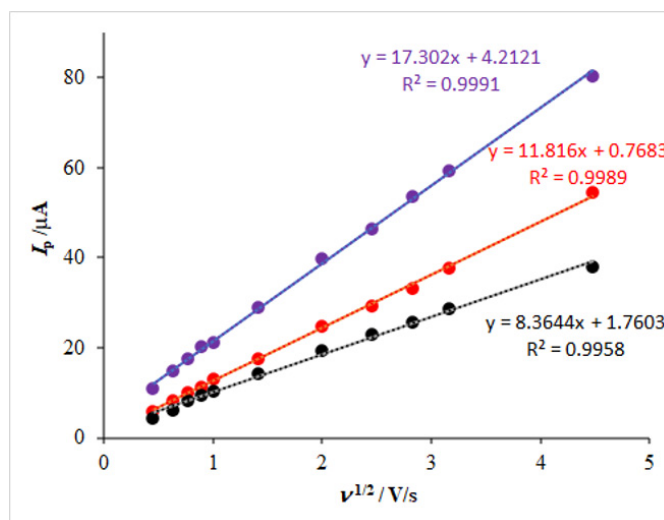

**Figure S3.** Plots of  $I_p$  versus  $v^{1/2}$  for the first (●) and second (●) reduction peaks of 2 as well as reduction peak of 3 (●).

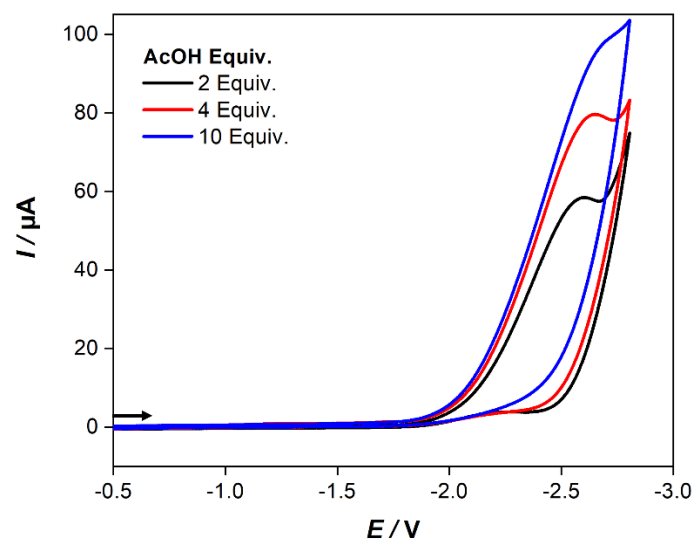

**Figure S4.** Cyclic voltammogram of various concentration of AcOH in  $\text{CH}_2\text{Cl}_2$ -[ $n\text{-Bu}_4\text{N}$ ][ $\text{BF}_4$ ] (0.1 M) solution at 0.2 V/s scan rate in the absence of catalyst (complexes 2 and 3). The arrow indicates the scan direction. The potentials  $E$  are given in V and referenced to the  $\text{Fc}^+/\text{Fc}$  couple.

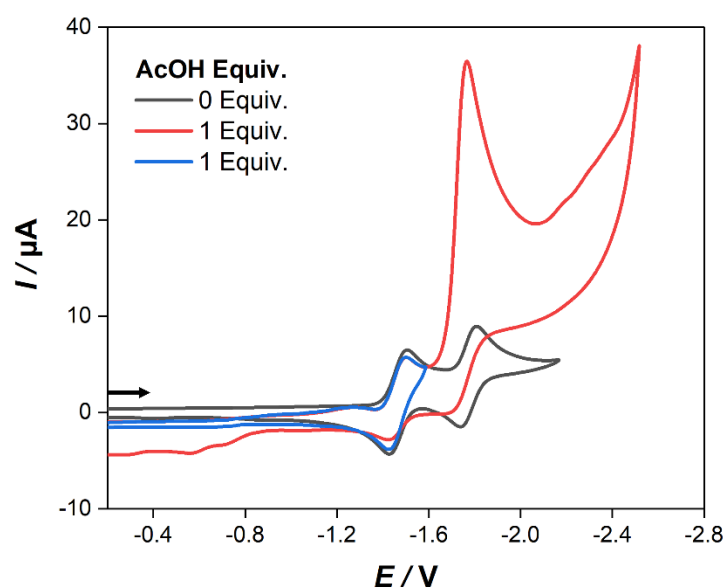

**Figure S5.** Cyclic voltammetry (0.2 V/s) of 1.0 mM of complex 2 in  $\text{CH}_2\text{Cl}_2$ - $[\text{n-Bu}_4\text{N}][\text{BF}_4]$  (0.1 M) in the presence of one equiv. AcOH. Potential  $E$  is given in volts V and referenced to  $\text{Fc}^+/\text{Fc}$  couple. The arrow indicates the scan direction.

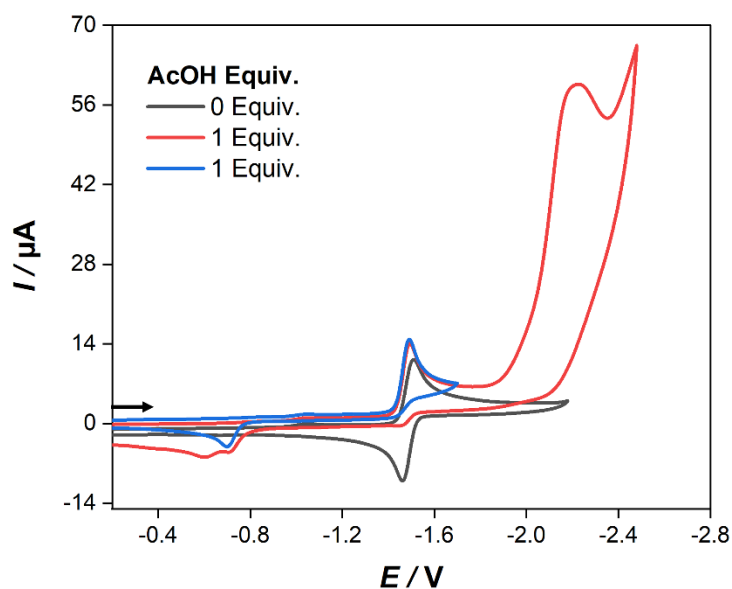

**Figure S6.** Cyclic voltammetry (0.2 V/s) of 1.0 mM of complex 3 in  $\text{CH}_2\text{Cl}_2$ - $[\text{n-Bu}_4\text{N}][\text{BF}_4]$  (0.1 M) in the presence of one equiv. AcOH. Potential  $E$  is given in volts V and referenced to  $\text{Fc}^+/\text{Fc}$  couple. The arrow indicates the scan direction.

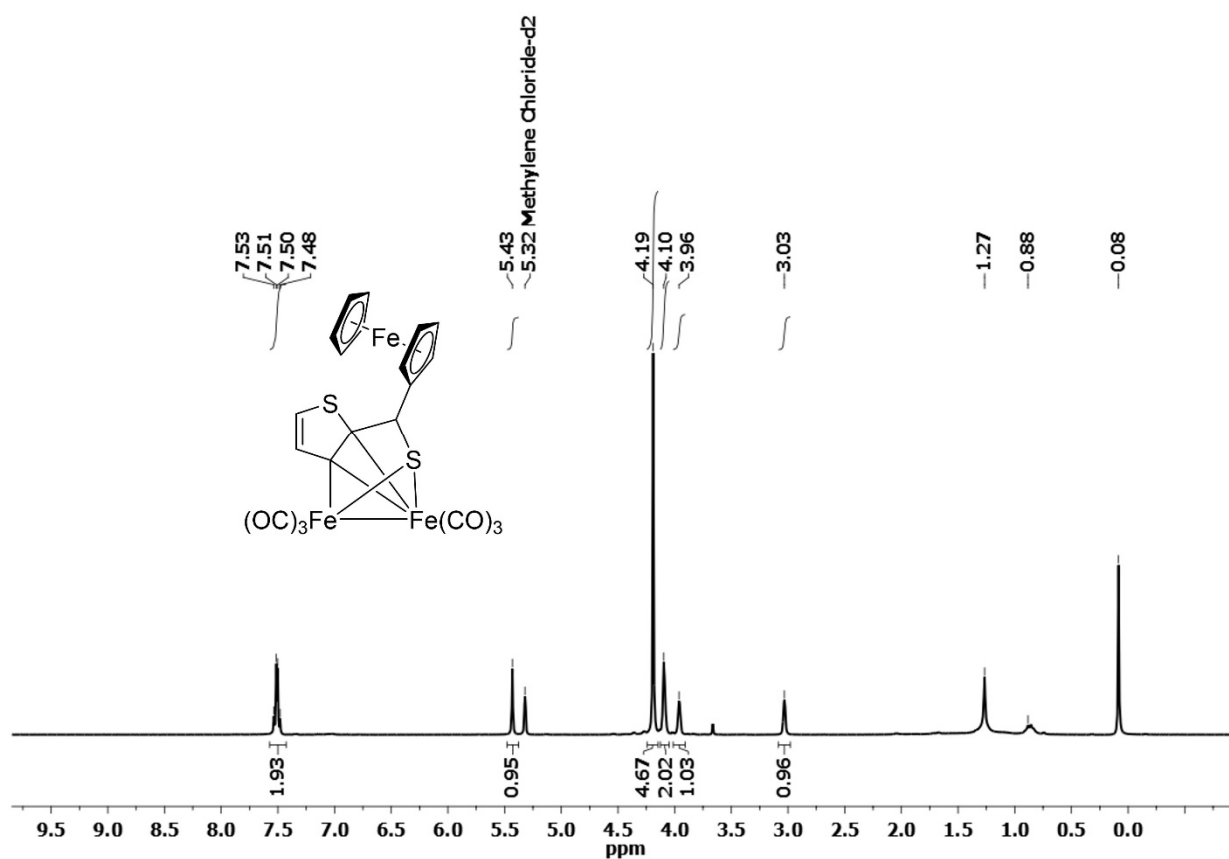

Figure S7.  $^1\text{H}$  NMR spectrum of compound **2** in dichloromethane- $\text{d}_2$  (400 MHz).

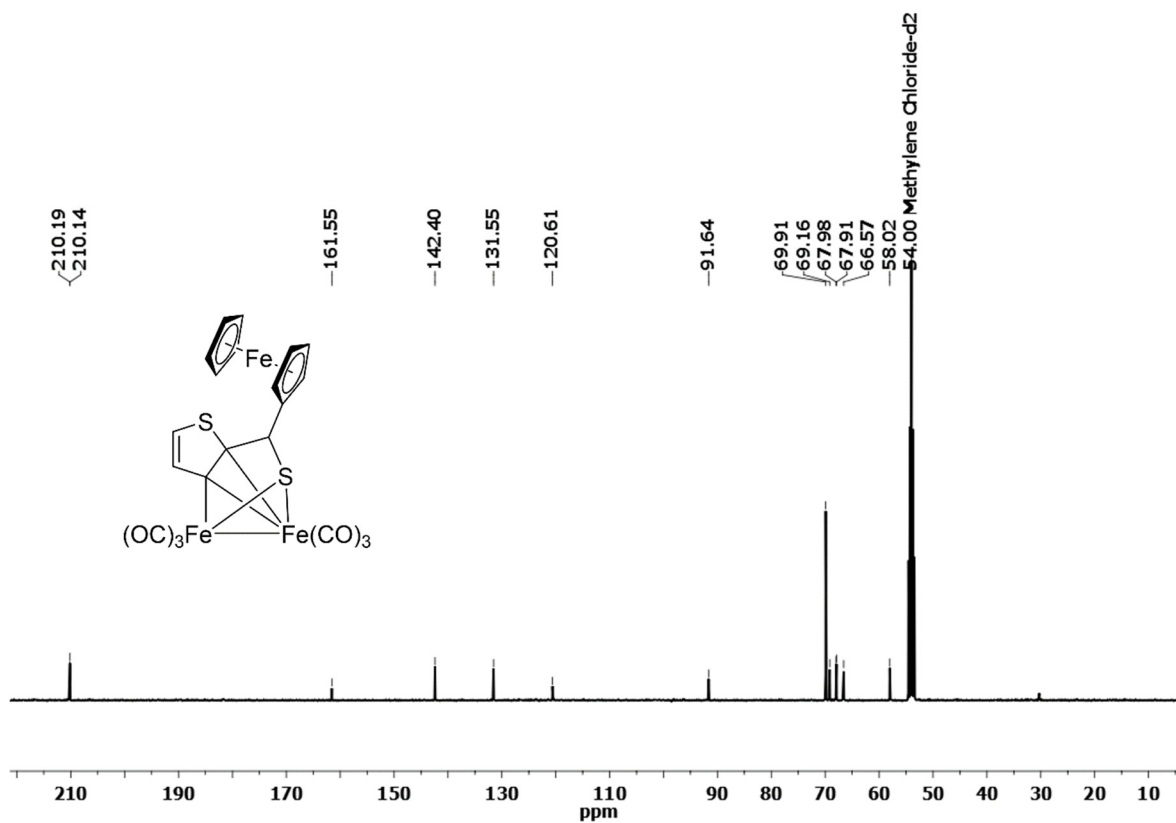

Figure S8.  $^{13}\text{C}\{^1\text{H}\}$  NMR spectrum of compound **2** in dichloromethane- $\text{d}_2$  (400 MHz).

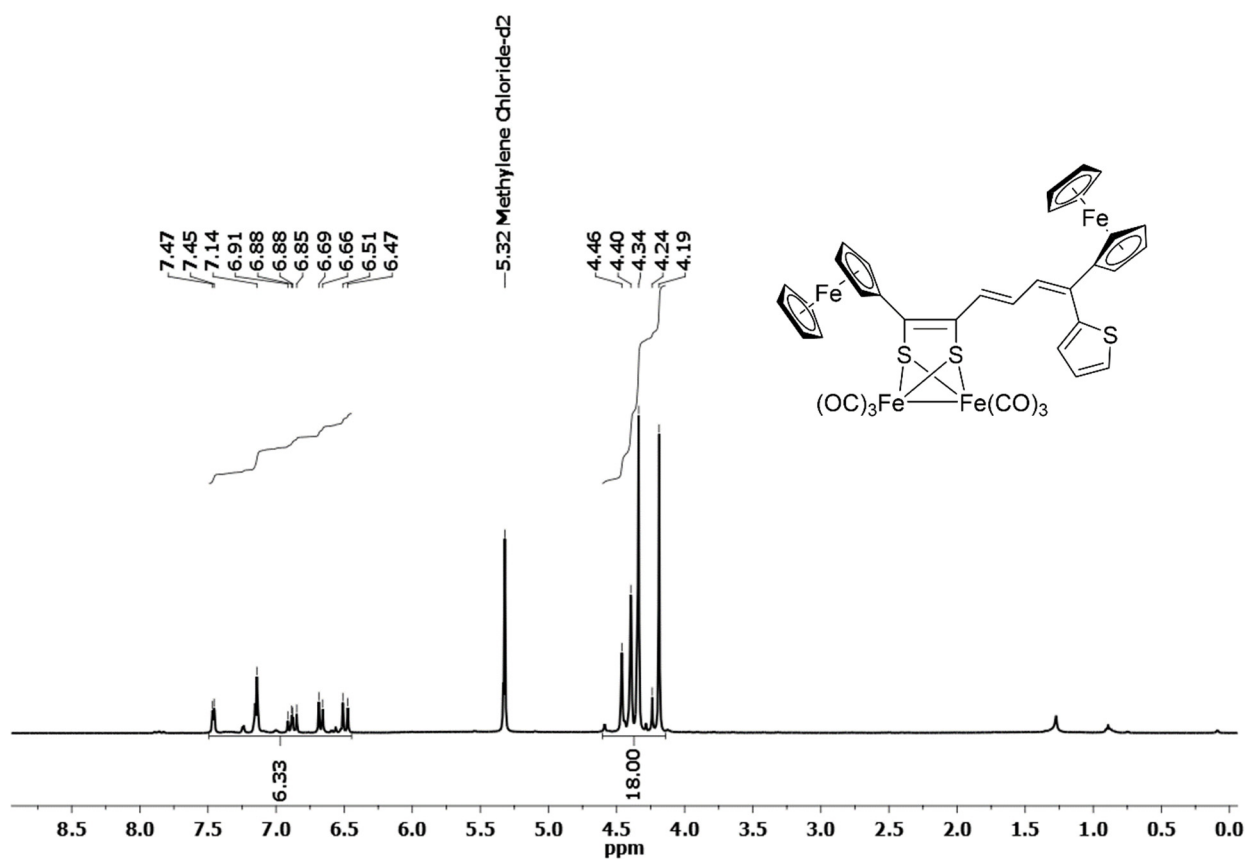

Figure S9.  $^1\text{H}$  NMR spectrum of compound 3 in dichloromethane- $\text{d}_2$  (400 MHz).

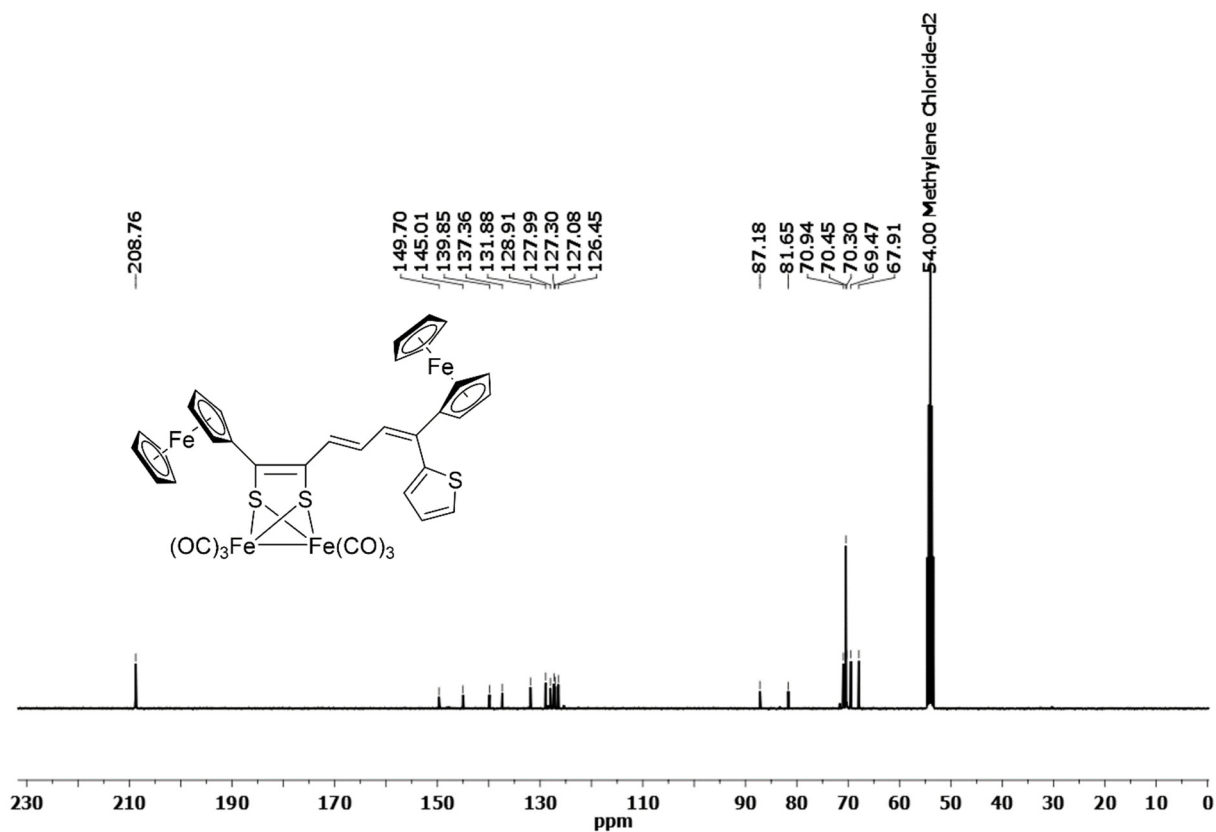

Figure S10.  $^{13}\text{C}\{^1\text{H}\}$  NMR spectrum of compound 3 in dichloromethane- $\text{d}_2$  (400 MHz).

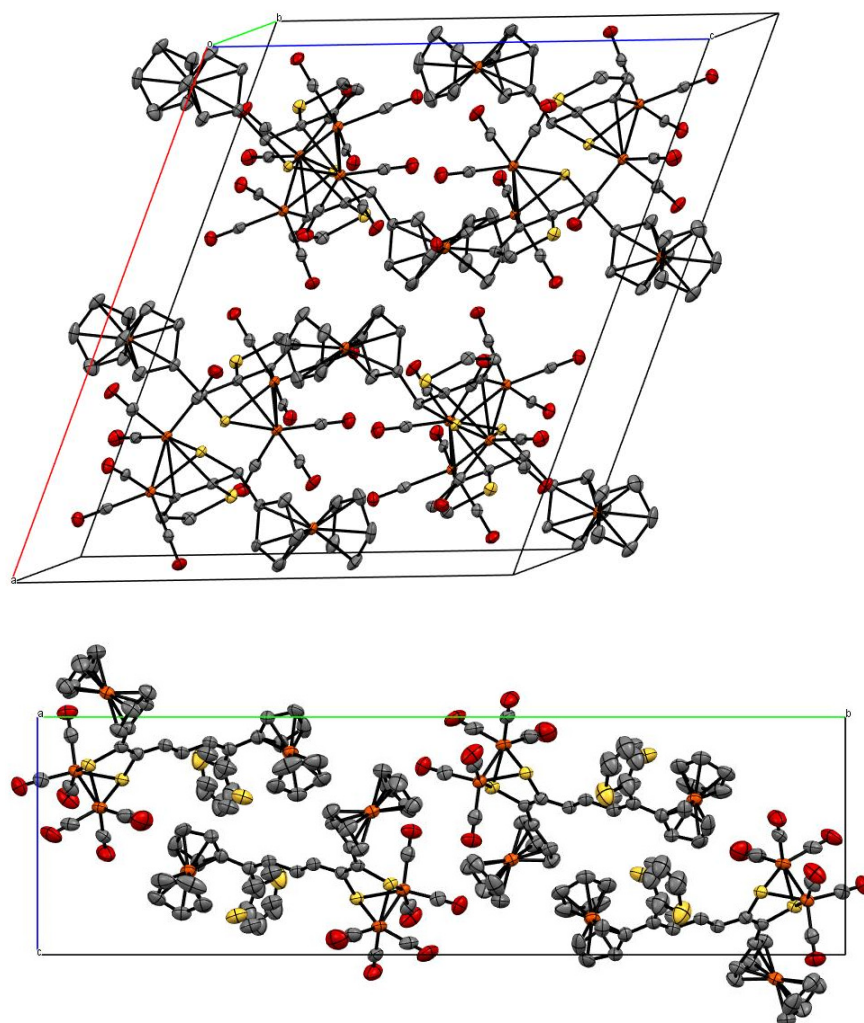

**Figure S11.** Packing diagrams of complexes **2** (top) and **3** (bottom).

## References

1. Frisch, M.J.; Trucks, G.W.; Schlegel, H.B.; Scuseria, G.E.; Robb, M.A.; Cheeseman, J.R.; Scalmani, G.; Barone, V.; Petersson, G.A.; Nakatsuji, H.; Li, X.; et al. *Gaussian 16 Rev. C.01*; Gaussian, Inc.: Wallingford, CT, USA, 2016.
2. Beck, A.D. Density-functional thermochemistry. III. The role of exact exchange. *J. Chem. Phys.* **1993**, *98*, 5648–5652.
3. Lee, C.; Yang, W.; Parr, R.G. Development of the Colle-Salvetti correlation-energy formula into a functional of the electron density. *Phys. Rev. B* **1988**, *37*, 785–789.
4. Dunning, T.H., Jr. Gaussian basis functions for use in molecular calculations. III. Contraction of (10s6p) atomic basis sets for the first-row atoms. *J. Chem. Phys.* **1971**, *55*, 716–723.
5. Dolg, M.; Wedig, U.; Stoll, H.; Preuss, H. A binitio pseudopotential study of the first-row transition metal monoxides and iron monohydride. *J. Chem. Phys.* **1987**, *86*, 2123–2131.
6. *COLLECT Data Collection Software*; Nonius B.V.: Delft, The Netherlands, 1998.
7. Otwinowski, Z.; Minor, W. Processing of X-Ray Diffraction Data Collected in Oscillation Mode. *Methods Enzymol.* **1997**, *276*, 307–326.
8. Krause, L.; Herbst-Irmer, R.; Sheldrick, G.M.; Stalke, D. Comparison of silver and molybdenum microfocus X-ray sources for single-crystal structure determination. *J. Appl. Cryst.* **2015**, *48*, 3–10.
9. Sheldrick, G.M. A short history of SHELX. *Acta Cryst.* **2008**, *A64*, 112–122.
10. Sheldrick, G.M. Crystal Structure Refinement with SHELXL. *Acta Crystallogr. Sect. C Struct. Chem.* **2015**, *C71*, 3–8.
11. Kratzert, D.; Krossing, I. Recent improvements in DSR. *J. Appl. Cryst.* **2018**, *51*, 928–934.
12. Macrae, C.F.; Edgington, P.R.; McCabe, P.; Pidcock, E.; Shields, G.P.; Taylor, R.; Towler, M.; van de Streek, J. Mercury: Visualization and analysis of crystal structures. *J. Appl. Crystallogr.* **2006**, *39*, 453–457.
